# Supplementary material for: Three and Two-Dimensional Cardiac Mechanic Parameters by Speckle Tracking Echocardiography are Predictors of Outcomes In Chagas Heart Disease
Source: Research Square preprint supplement (doi:10.21203/rs.3.rs-1050991/v1), 2021-11-17
Supplement: Supplementary file 1 [file dcd11fe63474f31bb1829447.docx]

**SUPPLEMENTAL FILES**

Table 7. CCC analysis concerning intraobserver and interobserver reproducibility of the 2D and 3D STE parameters.

|  | **INTRAOBSERVER** | | **INTEROBSERVER** | |
| --- | --- | --- | --- | --- |
| **C.C.C.** | **C.B.** | **C.C.C.** | **C.B.** |
| 2D GLS | 0.98 | 0.99 | 0.90 | 0.96 |
| 2D GCS | 0.62 | 0.95 | 0.57 | 0.70 |
| 2D GRS | 0.37 | 0.78 | 0.24 | 0.54 |
| 2D Displacement | 0.93 | 0.96 | 0.54 | 0.78 |
| 3D GLS | 0.92 | 0.95 | 0.88 | 0.96 |
| 3D Area Strain | 0.95 | 0.98 | 0.90 | 0.98 |
| 3D GRS | 0.87 | 0.92 | 0.83 | 0.93 |
| 3D GCS | 0.92 | 0.97 | 0.81 | 0.98 |

2D GLS, Two-dimensional global longitudinal strain; 2D GCS, Two-dimensional global circumferential strain; 2D GRS, Two-dimensional global radial strain; 3D GLS, Three-dimensional global longitudinal strain; 3D GCS, Three-dimensional global radial strain; 3D GRS, Three-dimensional global circumferential strain. CCC, Lin's concordance correlation coefficient (CCC); CB, accuracy.
